# Supplementary material for: The efficacy and safety of Serenoa repens extract for the treatment of patients with chronic prostatitis/chronic pelvic pain syndrome: a multicenter, randomized, double-blind, placebo-controlled trial
Source: Springer Nature journal article supplement (doi:10.1007/s00345-020-03577-2), 2021-01-16
Supplement: MOESM3 [file 18773308]

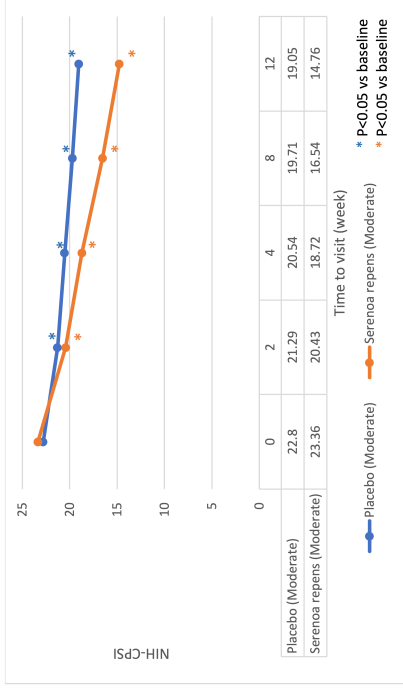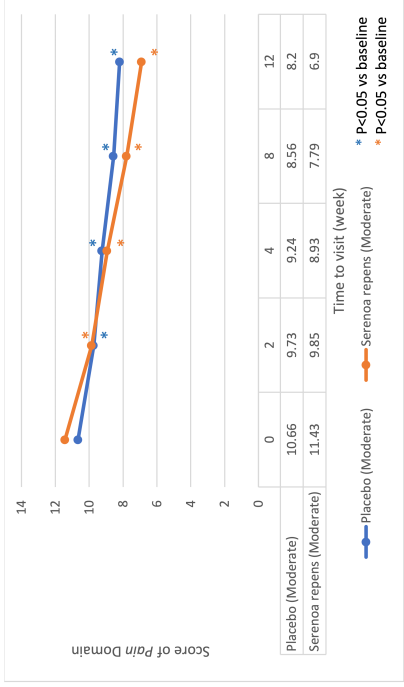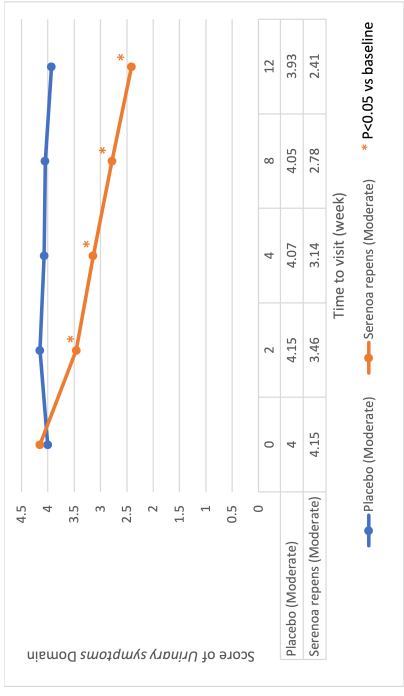

A

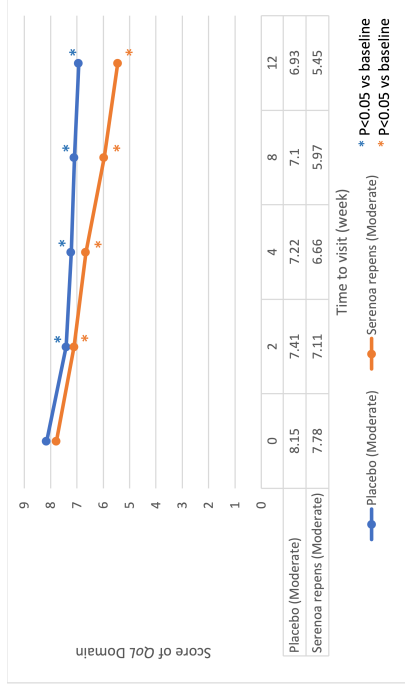

D

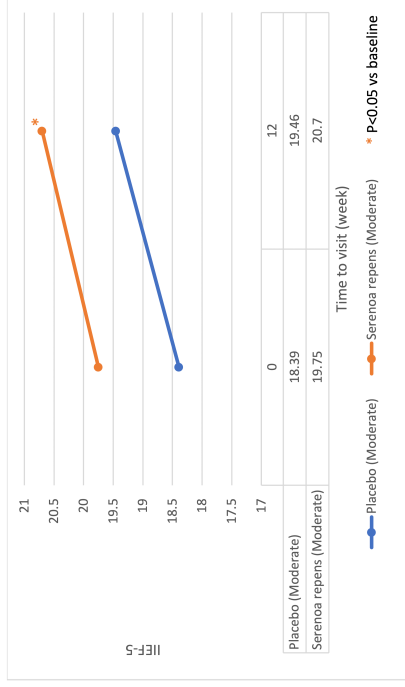

E

B

C
